# Supplementary material
Source: publisher figshare collection journal article supplement (https://gsapubs.figshare.com/ndownloader/files/22746638)
Supplement: Supplementary file 1 [file 22746638]

Petrinin, A and Sobolev, S.V, What controls thickness of sediments and lithospheric deformation at a pull-apart basin?

## SUPPLEMENTARY DATA

Table DR1. Rheological and thermo-elastic parameters used in the modelling.

| Parameters                                         | Upper crust                                                                                                                                          | Lower crust                                       | Mantle                    |
|----------------------------------------------------|------------------------------------------------------------------------------------------------------------------------------------------------------|---------------------------------------------------|---------------------------|
| Elastic and thermal constants [19]                 | strong/weak                                                                                                                                          | strong/weak                                       |                           |
| $\rho$ , [kg/m <sup>3</sup> ](at 20°C and 0.1 MPa) | 2700<br>2450(sediments)                                                                                                                              | 3000                                              | 3300                      |
| $\alpha$ , [K <sup>-1</sup> ]                      | $3.7 \cdot 10^{-5}$                                                                                                                                  | $2.7 \cdot 10^{-5}$                               | $3.0 \cdot 10^{-5}$       |
| K, G, [Gpa]                                        | 55, 36                                                                                                                                               | 63, 40                                            | 122, 74                   |
| C <sub>p</sub> , [J/kg/K]                          | 1200                                                                                                                                                 | 1200                                              | 1200                      |
| $\lambda$ , [W/K/m]                                | 2.5<br>2.0 (sediments)                                                                                                                               | 2.5                                               | 3.3                       |
| W, [ $\mu$ W/m <sup>3</sup> ]                      | 1.3                                                                                                                                                  | 0.2                                               | 0                         |
| Power-law creep constants                          | G&T1995                                                                                                                                              | R&D2001                                           | H&K1996                   |
| A, [MPa <sup>-n</sup> s <sup>-1</sup> ])           | $1.0 \cdot 10^{-4}/1.0$                                                                                                                              | $4.0 \cdot 10^2/4.0 \cdot 10^6/4.0 \cdot 10^{10}$ | $4.9 \cdot 10^4$          |
| E <sub>a</sub> , [J/mol]                           | $2.23 \cdot 10^5$                                                                                                                                    | $3.56 \cdot 10^5$                                 | $5.35 \cdot 10^5$         |
| n,                                                 | 4.0                                                                                                                                                  | 3.0                                               | 3.5                       |
| Mohr-Coulomb elasto-plasticity with softening      | Friction angle: 30°; dilation: 0°; cohesion: 20 MPa; linear decrease of cohesion to 2 MPa at strain 0.1 and of friction to 10 from strain 1.0 to 2.0 |                                                   | The same as for the crust |

Table DR2. Model specification

|                                                                                                                                                                                                                                                                                                                                                                                                                                                                                                                                                                                      |                                             |                                               |                                                            |                            |
|--------------------------------------------------------------------------------------------------------------------------------------------------------------------------------------------------------------------------------------------------------------------------------------------------------------------------------------------------------------------------------------------------------------------------------------------------------------------------------------------------------------------------------------------------------------------------------------|---------------------------------------------|-----------------------------------------------|------------------------------------------------------------|----------------------------|
| First Index,<br>temperature                                                                                                                                                                                                                                                                                                                                                                                                                                                                                                                                                          | 1-surface heat flow<br>50 mW/m <sup>2</sup> | 2-60 mW/m <sup>2</sup>                        | 3- 70 mW/m <sup>2</sup>                                    | 4- 80<br>mW/m <sup>2</sup> |
| Second Index,<br>Lower crustal<br>rheology                                                                                                                                                                                                                                                                                                                                                                                                                                                                                                                                           | 1-laboratory data<br>R&D2001                | 2-reduced strength<br>R&D2001, $A \cdot 10^4$ | 3- strongly reduced<br>strength R&D2001,<br>$A \cdot 10^8$ | -                          |
| Third Index, density<br>of sediments                                                                                                                                                                                                                                                                                                                                                                                                                                                                                                                                                 | 1-2200 kg/m <sup>3</sup>                    | 2-2450 kg/m <sup>3</sup>                      |                                                            | -                          |
| Additional Index: w (wide)-15 km spacing between the faults instead of 10 km in other models.<br>Model “weak”: same as m2.2.2 but with reduced strength of the upper crust (G&T1995 with $A \cdot 10^4$ )                                                                                                                                                                                                                                                                                                                                                                            |                                             |                                               |                                                            |                            |
| Examples: m2.1.1 indicates a model with 60 mW/m <sup>2</sup> surface heat flow, laboratory data for lower crustal rheology, 2200 kg/m <sup>3</sup> for density of sediments and 10 km spacing between the faults; model m3.2.2 indicates a model with 70 mW/m <sup>2</sup> surface heat flow, reduced strength of the lower crust (R&D2001, $A \cdot 10^4$ ), 2450 kg/m <sup>3</sup> for density of sediments and 10 km spacing between the faults; model m3.2.2w indicates a model which is the same as model m3.2.2 but with spacing between the faults of 15 km instead of 10 km. |                                             |                                               |                                                            |                            |
| List of models (models where no pull-apart deformation was achieved are underlined):<br><u>m1.1.1</u> , <u>m1.2.1</u> , m2.1.1, m2.1.2, m2.2.1, m2.2.1w, m2.2.2, m2.2.2w, m2.3.2, m3.2.2, m4.2.2,                                                                                                                                                                                                                                                                                                                                                                                    |                                             |                                               |                                                            |                            |

R&D2001: Rybacki and Dresen (2001); G&T1995: Gleason and Tullis (1995); H&K1996:

Hirth and Kohlstedt, 1996

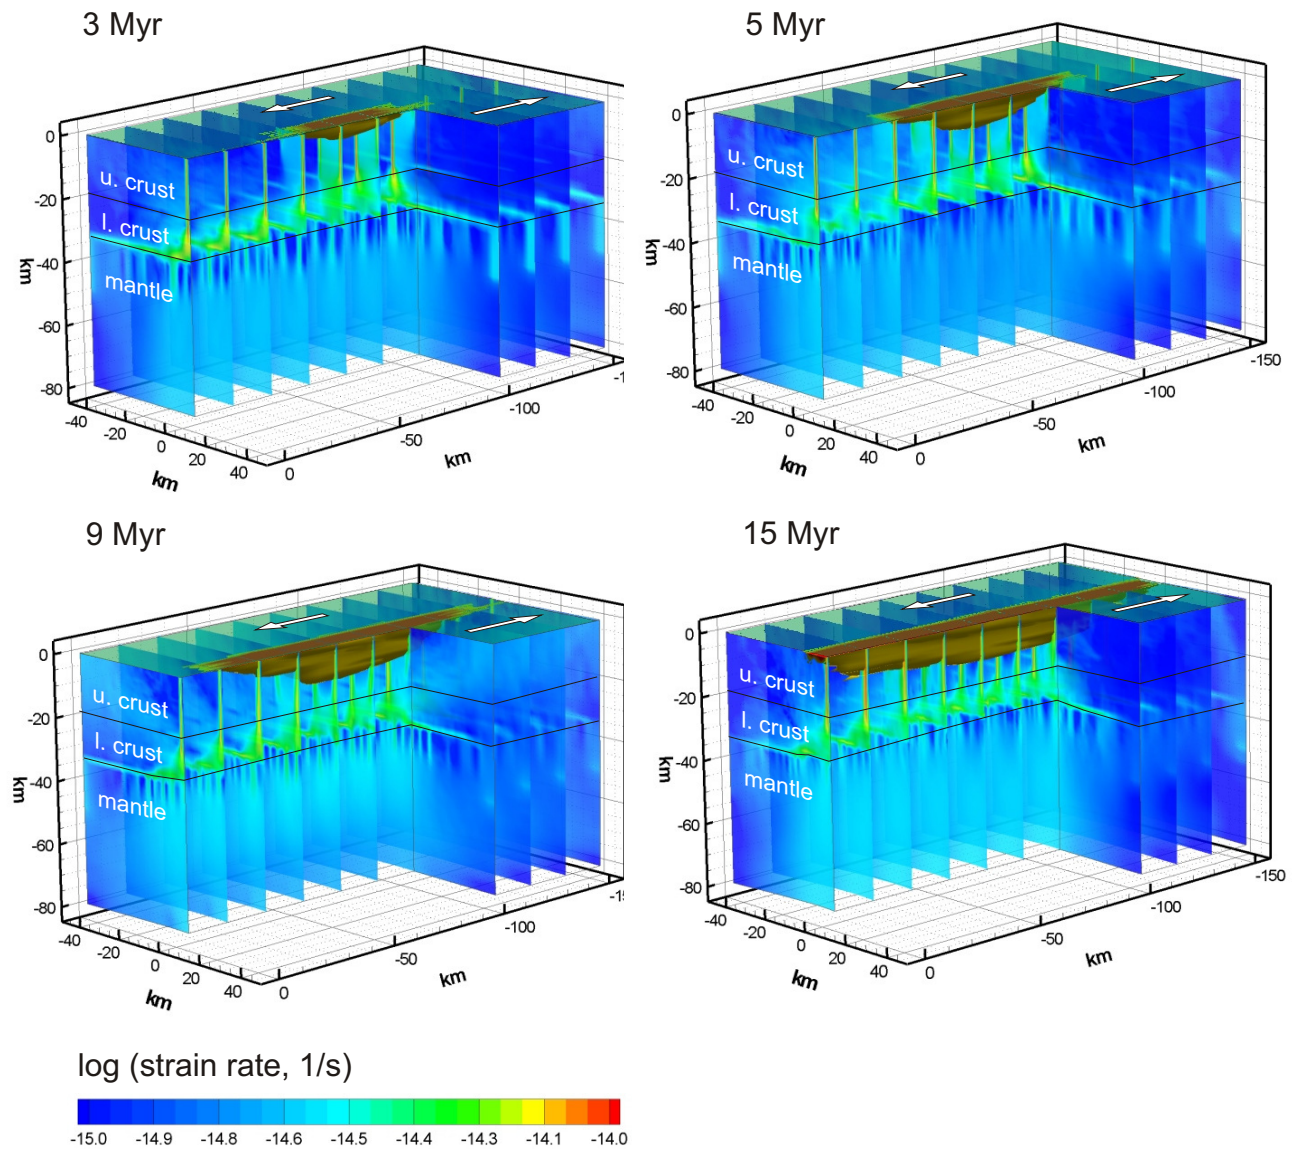

**Fig. DR1.** Evolution of the strain rate distribution for the pull-apart model m2.2.1. The colours show log strain rate distribution at cross-sections. Note that the upper-middle crust beneath the growing basin (brown) is almost completely detached from the lower crust and upper mantle.

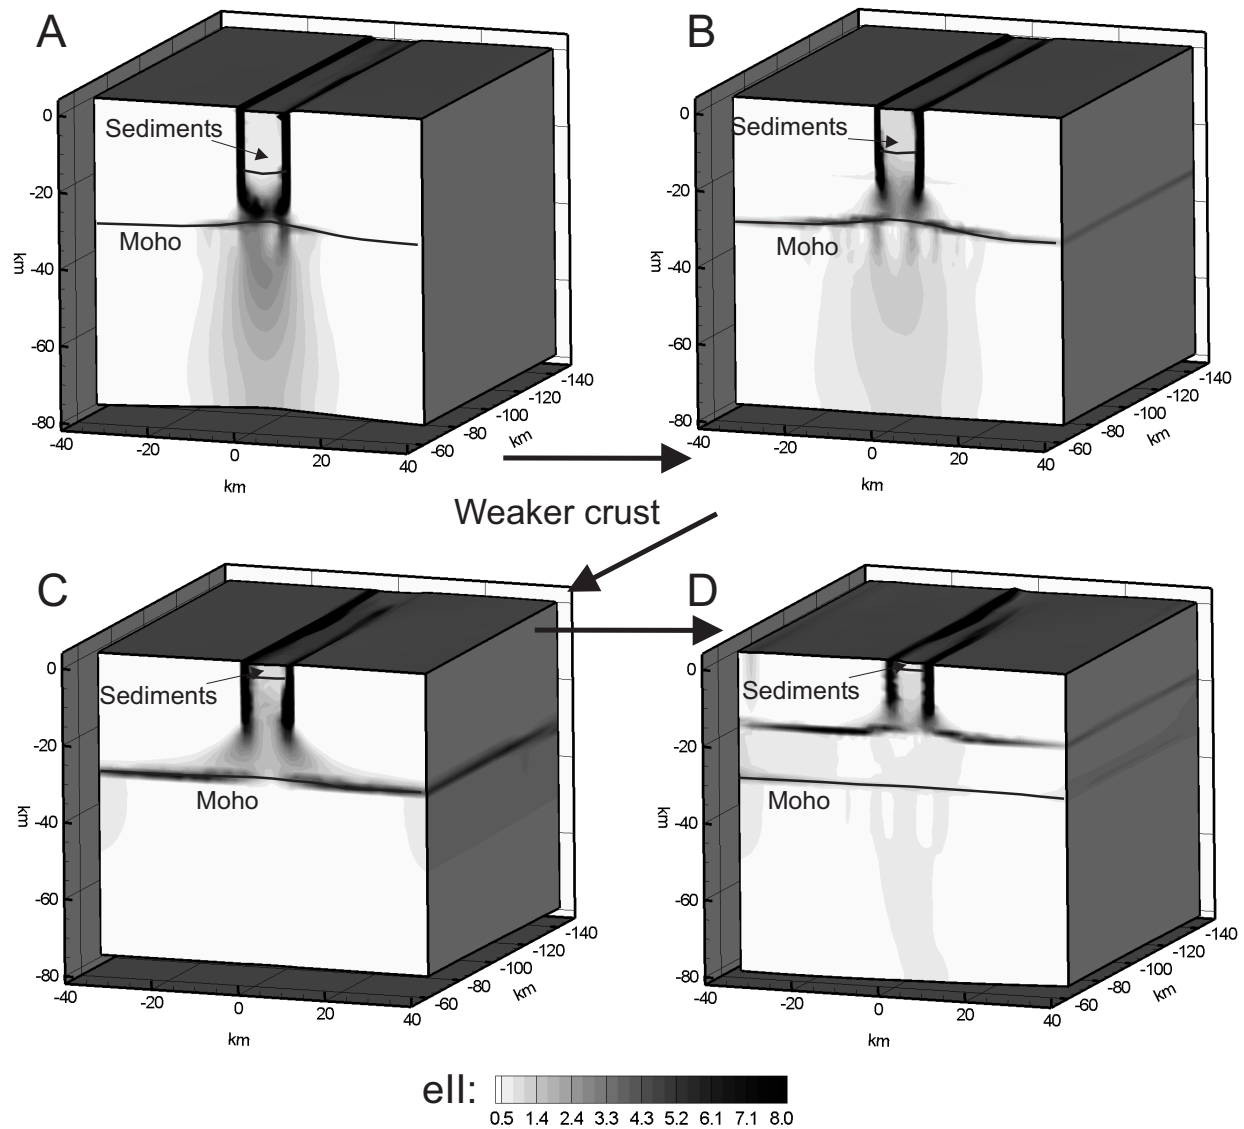

**Fig.DR2.** (a-d) Distribution of cumulative finite strain after 100 km of strike-slip displacement in the sections crossing the central part of a pull-apart basin for models with gradually decreasing crustal viscosity. Note that the stronger the crust the deeper is the detachment (indicated as domain of high strain) and the thicker is the sedimentary fill of the basin.

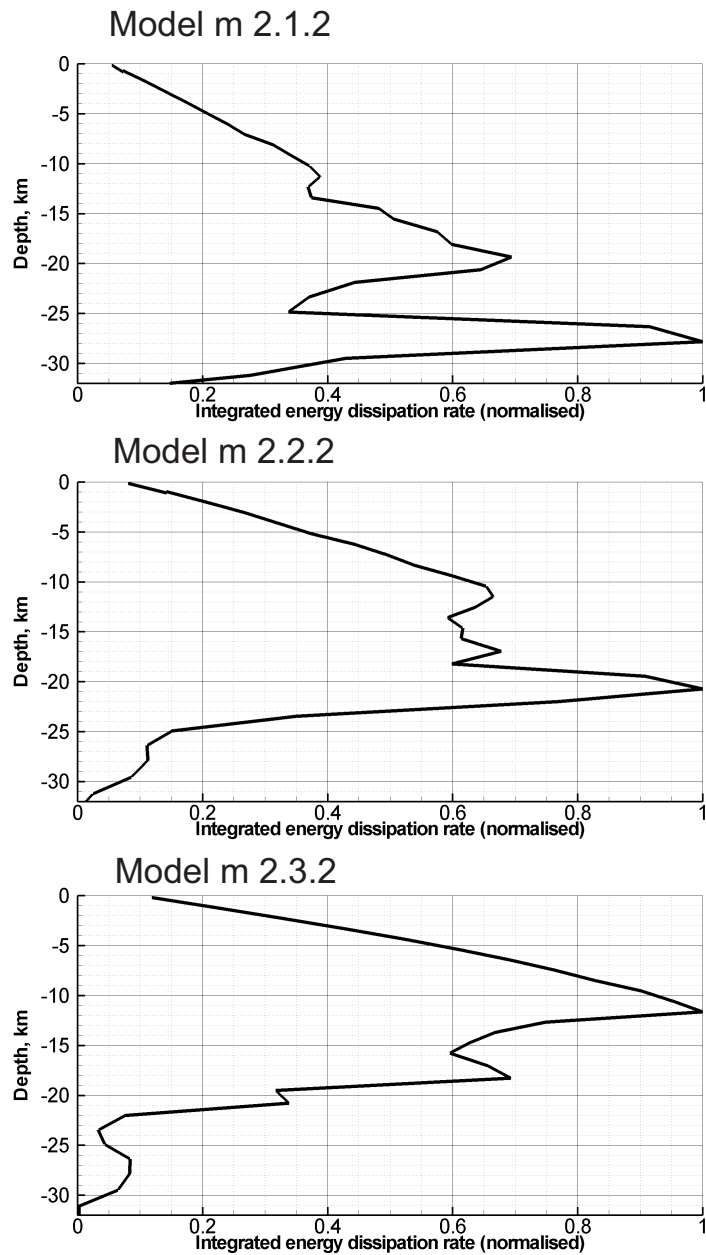

**Fig. DR 3.** Depth dependencies of the integrated rate of energy dissipation beneath the central part of a model basin for models with different viscosity of the lower crust. The values are normalized
